# Supplementary material for: The Role of MAPT Haplotype H2 and Isoform 1N/4R in Parkinsonism of Older Adults
Source: PubMed Central journal article supplement (PMC4961370; doi:10.1371/journal.pone.0157452), 2016-07-26

**Figure S1a. Relation between age at time of death and *MAPT* expression stratified by H1/H2 haplotype (p<0.001 age, sex, study and H2 only; p<0.0001 adjusting for age, sex, study, H2 + path).**

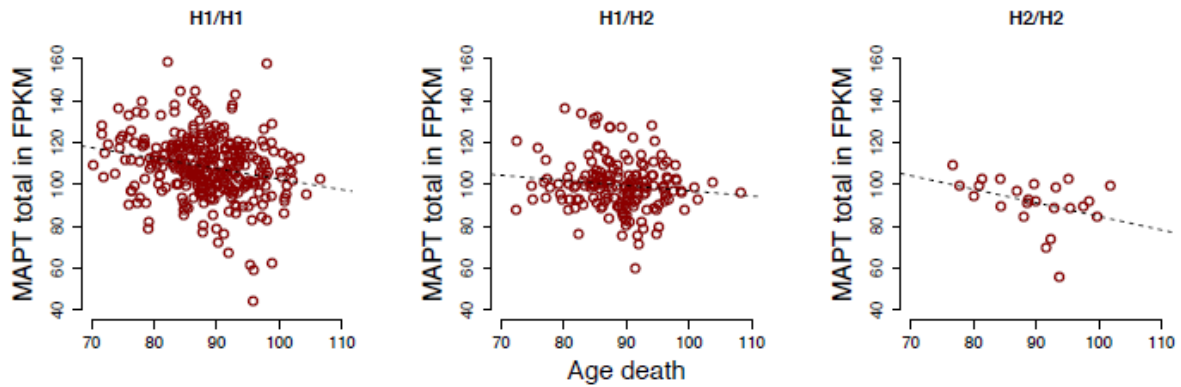

**Figure S1b. Relation between age at time of death and *MAPT* 1N4R expression stratified by H1/H2 (p=0.58 adjusting for pathologies).**

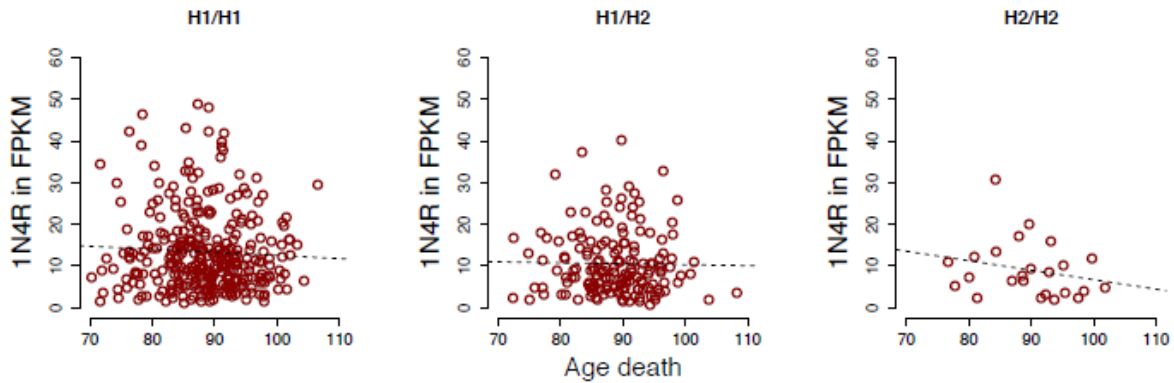

Supplement: pone.0157452.s001.pdf [file pone.0157452.s001.pdf]
