# Supplementary material for: The Role of MAPT Haplotype H2 and Isoform 1N/4R in Parkinsonism of Older Adults
Source: PubMed Central journal article supplement (PMC4961370; doi:10.1371/journal.pone.0157452), 2016-07-26

**Figure S2a. Relationship between motor traits scores at time prior to death and *MAPT* total expression (global parkinsonism score,  $p=0.14$ ; bradykinesia score,  $p=0.45$ ; gait score,  $p=0.12$ ).**

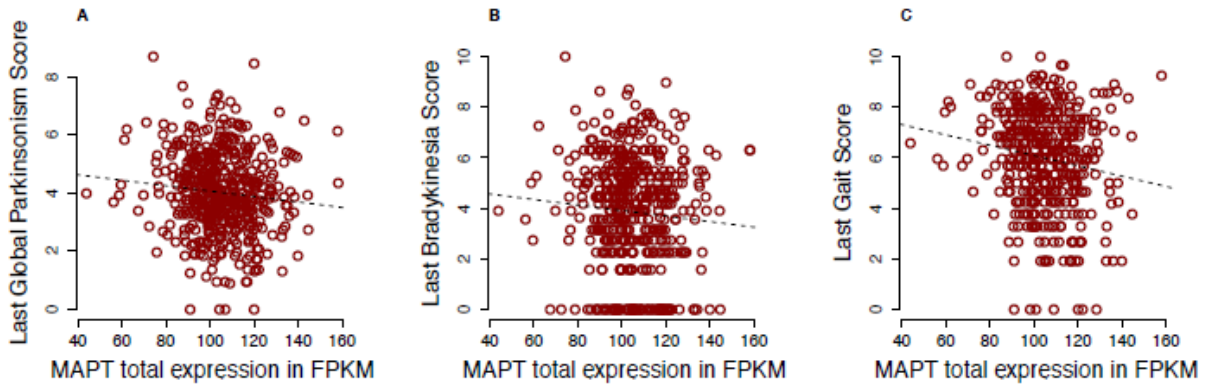

**Figure S2b. Relationship between motor traits scores at time prior to death and *MAPT 1N4R* total expression (global parkinsonism score,  $p=0.008$ ; bradykinesia score,  $p=0.008$ ; gait score,  $p=0.039$ ).**

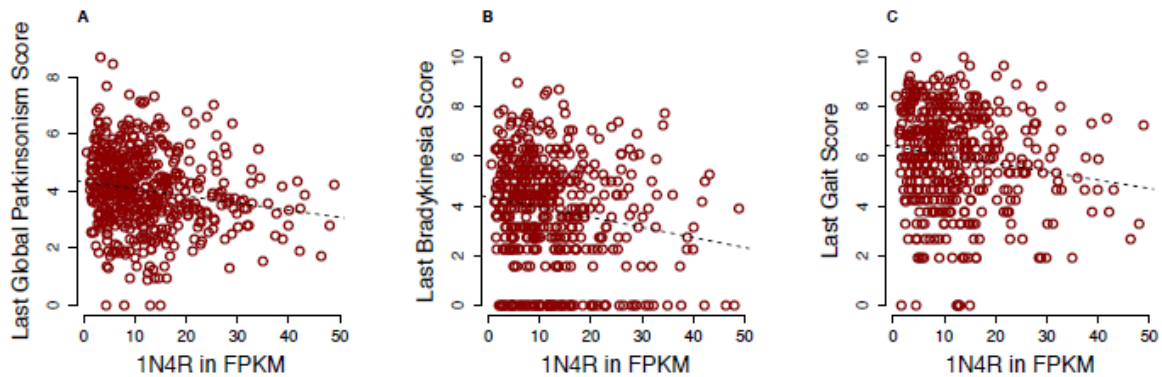

Supplement: pone.0157452.s002.pdf [file pone.0157452.s002.pdf]
