# Supplementary material for: The Role of MAPT Haplotype H2 and Isoform 1N/4R in Parkinsonism of Older Adults
Source: PubMed Central journal article supplement (PMC4961370; doi:10.1371/journal.pone.0157452), 2016-07-26

**Figure S3. Relation between global parkinsonism score at time prior to death and *MAPT* isoform 1N/4R expression adjusted for *MAPT* total expression and brain pathology (p=0.012).**

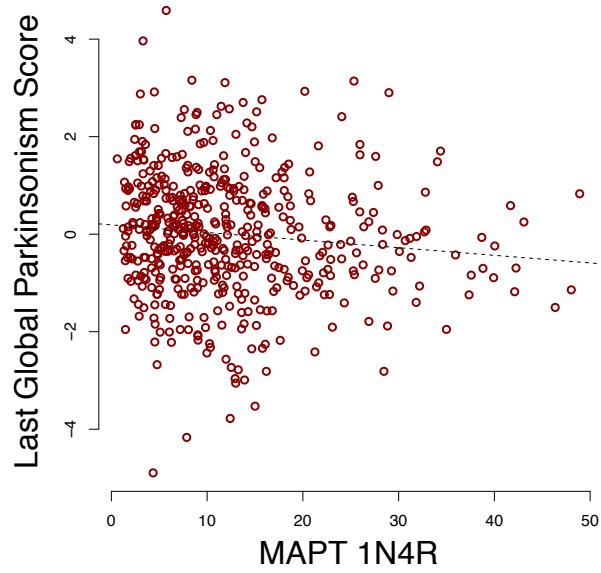

Supplement: pone.0157452.s003.pdf [file pone.0157452.s003.pdf]
